# Supplementary material for: A sensitive liquid chromatography-tandem mass spectrometry method for monitoring the caspofungin trough plasma concentration and its association with caspofungin efficacy in intensive-care-unit patients
Source: Royal Society of Chemistry journal article supplement (doi:10.1039/c5ra21080a), 2015-01-01
Supplement: c5ra21080a1.pdf [file c5ra21080a1.pdf]

**Table S1.** An overview of currently published analytical methods for caspofungin determination

| Method<br>(Year)              | IS                      | Standard curves<br>(mg/L) | Mobile Phase                                                                                                                                                                                                                            | Column                                                            | Flow Rate<br>(mL/min) | Run time<br>(min) | Reference |
|-------------------------------|-------------------------|---------------------------|-----------------------------------------------------------------------------------------------------------------------------------------------------------------------------------------------------------------------------------------|-------------------------------------------------------------------|-----------------------|-------------------|-----------|
| LC-MS/MS<br>(2006)            | Caspofungin<br>isotope  | 0.04-20                   | Mobile phase A: 10mM ammonium acetate in H <sub>2</sub> O containing 1% aceticacid; Mobile phase B: 1% aceticacid in MeCN. Mobile-phase system (A:B): (75:25-30:70) (0-5.5min); (30:70-2:98) (5.5-10.0min); (2:98-75:25) (10.0-15.0min) | RP8 analytical column (2.1×30mm, 3.5µm )                          | 0.4                   | 15                | [11]      |
| UPLC-MS/MS<br>(2010)          | Deuterated<br>isotopic  | 0.01-50                   | Mobile phase A: 10 mM ammonium formate in ultrapure water plus 0.1% FA; Mobile phase B: acetonitrile plus 0.1% FA                                                                                                                       | Acquity UPLC C <sub>18</sub> analytical column (2.1× 30mm, 1.7µm) | 0.5                   | 7                 | [12]      |
| LC-MS/MS<br>(2010)            | Caspofungin<br>derivate | 0.108-5.4                 | Mobile phase A: water with 0.1% formic acid; Mobile phase B: Acetonitrile. Mobile-phase system (A:B): (50:50-25:75) (0-3.2min); (25:75-10:90) (3.2-3.5min); (10:90-10:90) (3.5-6.8min); (10:90-50:50) (6.8-8.0min)                      | BetaBasic C <sub>4</sub> (100× 3.0 mm)                            | 0.25                  | 8                 | [13]      |
| LC-MS/MS<br>(2013)            | Anidulafungin           | 0.1-20                    | Mobile phase A: an aqueous buffer (pH 3.5) containing ammonium acetate (5 g/L), acetic acid (35 mg/L), and trifluoroacetic anhydride (2 mL/L) in water; Mobile phase B: Water; Mobile phase C: acetonitrile                             | BetaBasic C <sub>4</sub> (100× 3.0 mm)                            | 0.25                  | 10                | [14]      |
| LC-LC/<br>ESI-MS/MS<br>(2004) | ND                      | 0.2-20                    | pure water<br>acetonitrile                                                                                                                                                                                                              | Vertex Eurospher<br>100 Diol (30×4mm,<br>7µm); Vertex             | 0.8<br>0.4            | 30                | [15]      |

|                       |                |         |                                                                                                                          |                                                                                        |     |    |      |
|-----------------------|----------------|---------|--------------------------------------------------------------------------------------------------------------------------|----------------------------------------------------------------------------------------|-----|----|------|
| UHPLC-MS/MS<br>(2012) | Anidulafungin  | 0.06-30 | Mobile phase A: 10mM ammonium formate with 0.1% FA; Mobile phase B: MeCN with 0.1% FA                                    | Eurospher 100 CN<br>(30× 4mm, 7um )<br>C <sub>18</sub> column (2.1 × 30<br>mm, 1.7 um) | 0.4 | 7  | [16] |
| HPLC<br>(2006)        | Clarithromycin | 0.07-35 | A solution of anhydrous citric acid (0.05M), adjusted to pH 6.3 with sodiumhydroxide, and acetonitrile in a 67:33 volume | LiChroCART CN,<br>(250×4.0mm, 5um )                                                    | 1.0 | 10 | [17] |
